# Supplementary material for: Surface De-PEGylation Controls Nanoparticle-Mediated siRNA Delivery In Vitro and In Vivo
Source: PubMed Central journal article supplement — Theranostics. 2017 May 12;7(7):1990–2002. doi: 10.7150/thno.18136 (PMC5479285; doi:10.7150/thno.18136), 2017-05-12
Supplement: thnov07p1990s1.pdf [file thnov07p1990s1.pdf]

***Supplementary Information***

**Surface De-PEGylation Controls Nanoparticle-Mediated siRNA Delivery In Vitro and In Vivo**

Xi Zhu<sup>1,2,#</sup>, Wei Tao<sup>1,#</sup>, Danny Liu<sup>1,3</sup>, Jun Wu<sup>1,4</sup>, Zilei Guo<sup>1</sup>, Xiaoyuan Ji<sup>1</sup>, Zameer Bharwani<sup>1</sup>, Lili Zhao<sup>1,5</sup>, Xiaoping Zhao<sup>2</sup>, Omid C. Farokhzad<sup>1,6\*</sup>, Jinjun Shi<sup>1\*</sup>

<sup>1</sup> Center for Nanomedicine and Department of Anesthesiology, Brigham and Women's Hospital, Harvard Medical School, Boston, MA 02115, USA

<sup>2</sup> National Shanghai Center for New Drug Safety Evaluation and Research, Shanghai, 201203, China

<sup>3</sup> Department of Chemistry, University of Waterloo, Waterloo, Ontario N2L 3G1, Canada

<sup>4</sup> Department of Biomedical Engineering, School of Engineering, Sun Yet-sen University, Guangzhou, 510006, China

<sup>5</sup> Department of Endoscopy, the First Affiliated Hospital of Nanjing Medical University, Jiangsu Province Hospital, Nanjing, 210029, China

<sup>6</sup> King Abdulaziz University, Jeddah 21589, Saudi Arabia

# X.Z. and W.T. contributed equally to this work.

\* Email: ofarokhzad@bwh.harvard.edu (O.C.F.), \*Email: jshi@bwh.harvard.edu (J.S.).

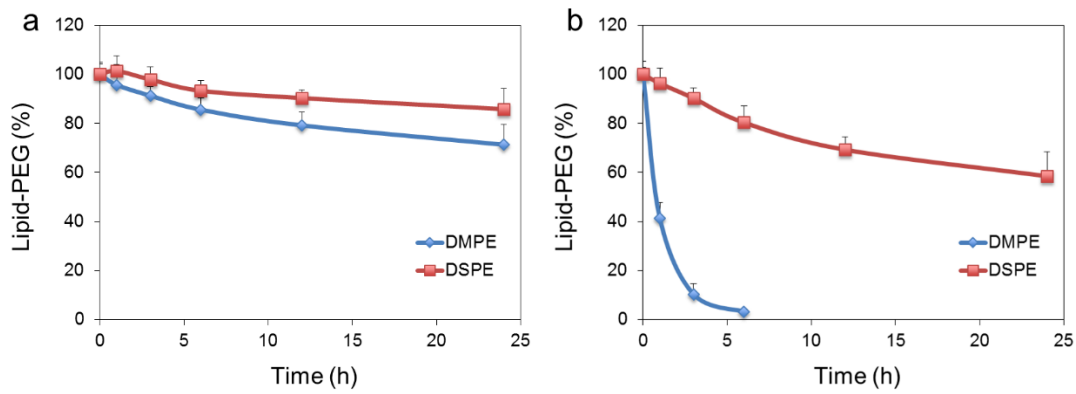

**Figure S1.** Dissociation kinetics of two lipid-PEGs (DSPE-PEG and DMPE-PEG) from respective NPs in (a) PBS without albumin, and (b) FBS.

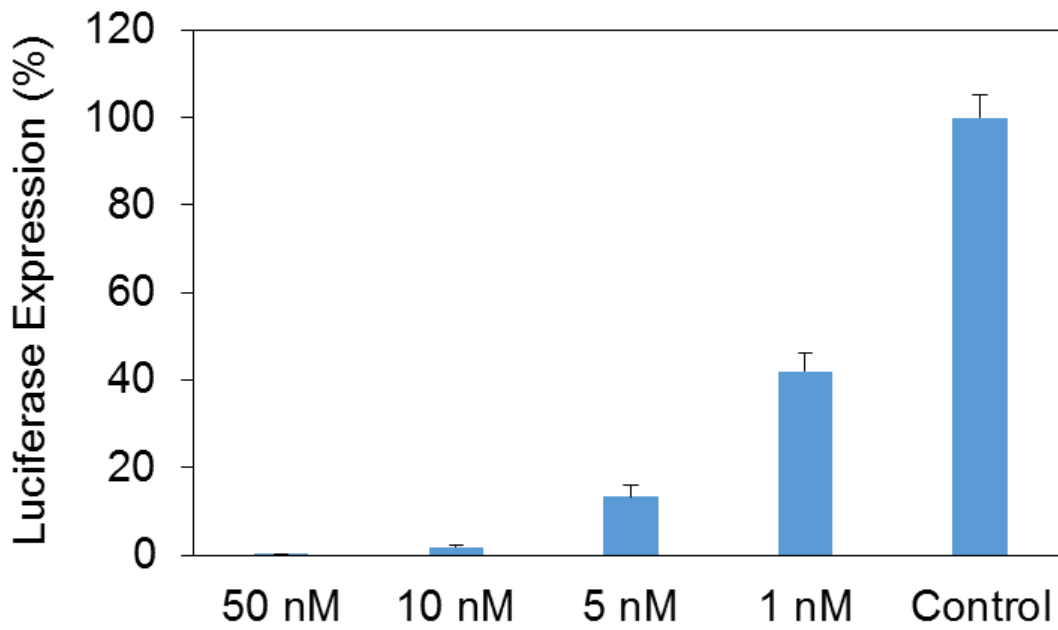

**Figure S2.** *In vitro* silencing efficacy of the PLGA/G0-C14 siRNA NPs without PEGylation.

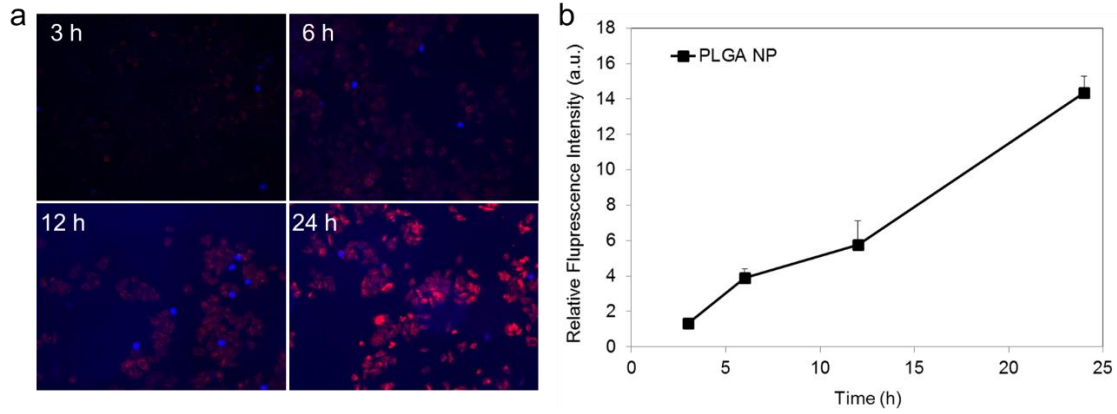

**Figure S3.** Uptake kinetics of the PLGA/G0-C14 siRNA NPs without PEGylation by Luc-HeLa cells.

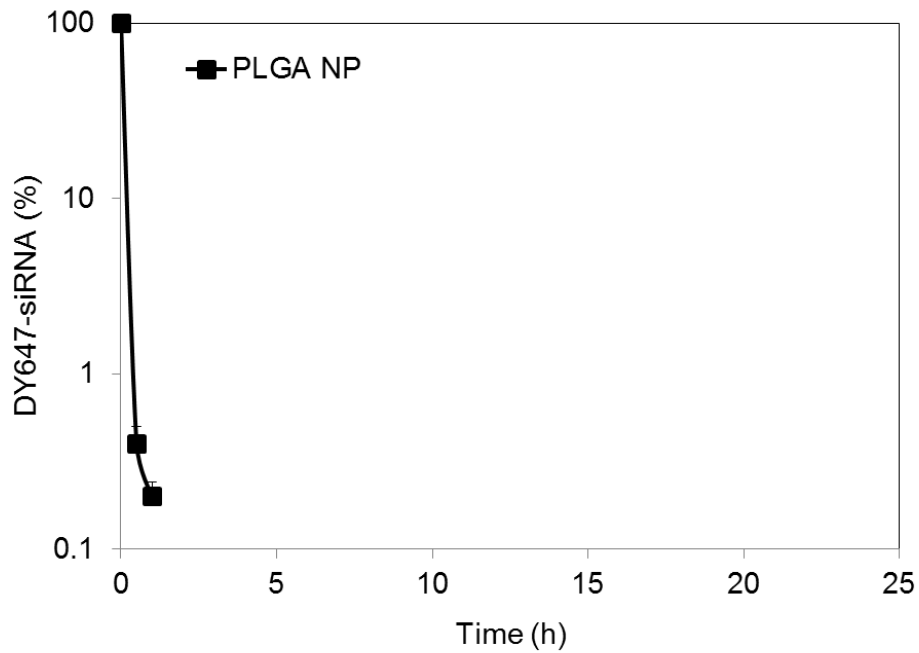

**Figure S4.** Circulation profile of the PLGA/G0-C14 siRNA NPs without PEGylation after IV injection (siRNA was labeled with fluorophore DY647).
